# Supplementary material for: Predictors of preterm births in North Dakota: a retrospective study of the North Dakota Pregnancy Risk Assessment Monitoring System (PRAMS)
Source: PeerJ. 2025 Mar 17;13:e19049. doi: 10.7717/peerj.19049 (PMC11925044; doi:10.7717/peerj.19049)
Supplement: Supplemental Information 1 [file peerj-13-19049-s001.xlsx]

## Sheet: Data Dictionary
Variable	Variable Type	Category definitions
MARRIED	Categorical	1=Married; 2=Other
MAT_RACEA	Categorical	IN=American Indian; OT=Other Race/Ethnicity; WH=White
MM_HBP	Categorical	1=Yes; 2=No
MM_PROM	Categorical	1=Yes; 2=No
P_PRTERM	Categorical	1=Yes; 2=No
PNC_VST_NAPHSIS	Categorical	1=First trimester; 2=Second trimester; 3=Third trimester
SMK63B_A	Categorical	1=No; 2=Yes
STRATUMC	Continuous
TOTCNT	Continuous
URB_RUR	Categorical	1=Urban; 2=Rural
WTANAL	Continuous
SUD_NEST	Continuous
medicaid	Categorical	1=Yes; 0=No
agecat	Categorical	1= "<20"; 2: "20-34"; 3= "35+
plurality	Categorical	1=Yes; 0=No
